# Supplementary material
Source: MDPI journal article supplement (https://www.mdpi.com/2076-3298/9/1/4)
Supplement: s1 [file s1]

## Supplementary material

### ANOVA and MANOVA analysis

$^{55}\text{Mn}[\text{He}]$

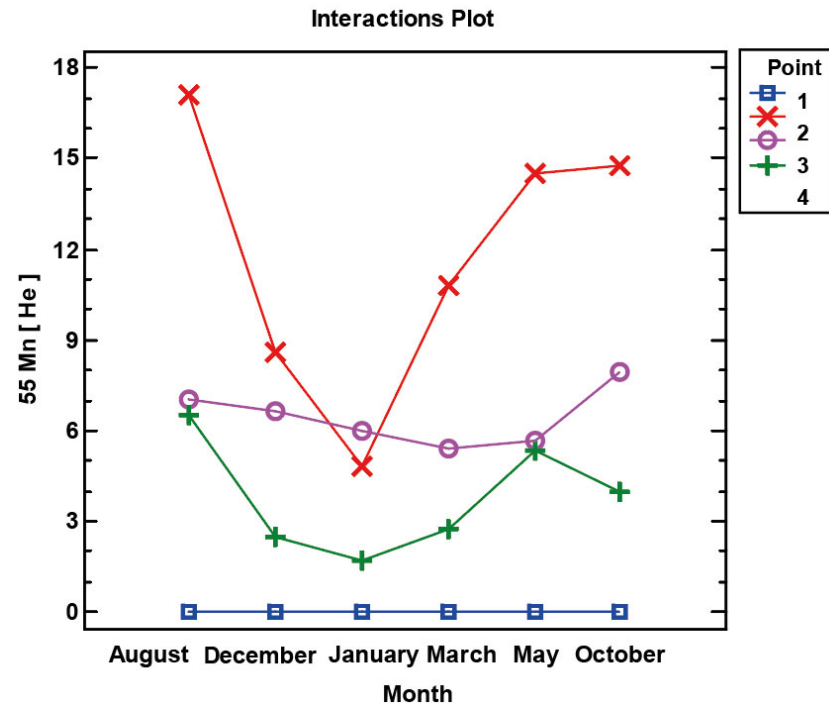

Figure S1. MANOVA: Point and month interaction.

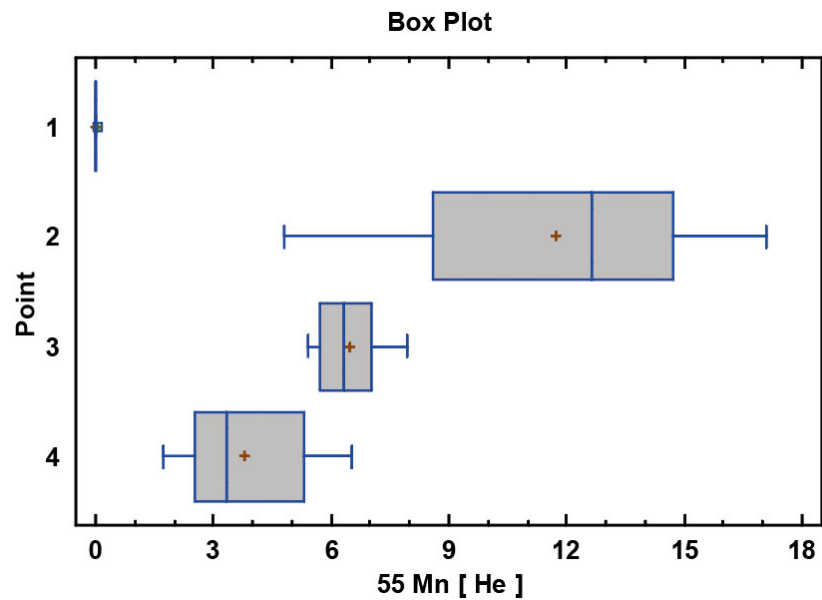

Figure S2. ANOVA point.

**Table S5.** ANOVA table for  $^{55}\text{Mn}$  [ He ] by Point.

| Source         | Sum of Squares | Df | Mean Square | F-Ratio | P-Value |
|----------------|----------------|----|-------------|---------|---------|
| Between gorups | 438.543        | 3  | 146.181     | 23.35   | 0.0000  |
| Within groups  | 125.19         | 20 | 6.25948     |         |         |
| Total (Corr.)  | 563.733        | 23 |             |         |         |

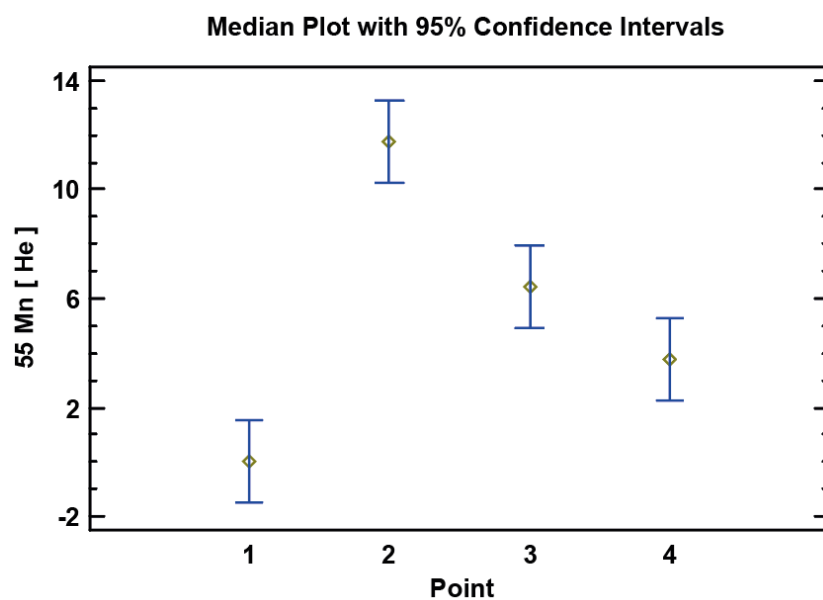

**Figure S3.** Median plot with 95% confidence intervals.

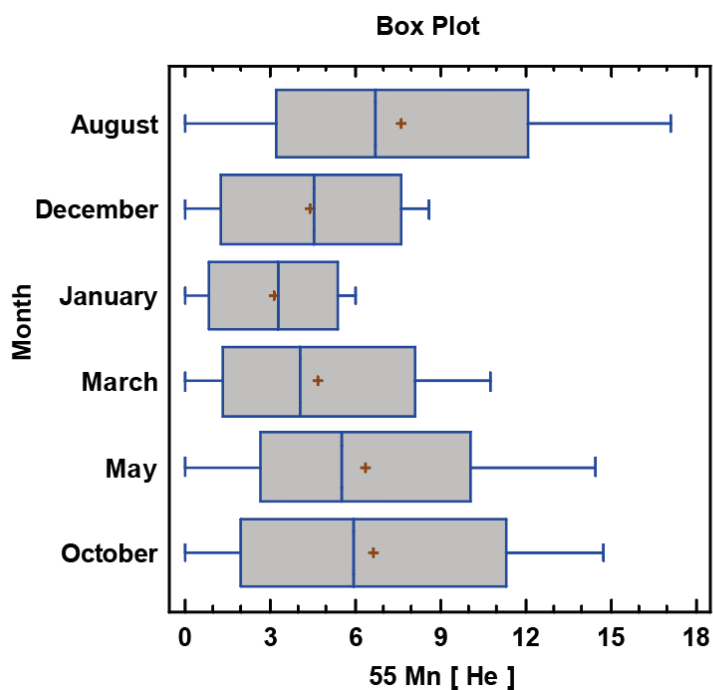

**Figure S4.** ANOVA month.

**Table S6.** ANOVA table for  $^{55}\text{Mn}$  [ He ] by Month.

| Source         | Sum of Squares | Df | Mean Square | F-Ratio | P-Value |
|----------------|----------------|----|-------------|---------|---------|
| Between gorups | 56.2754        | 5  | 11.2551     | 0.40    | 0.8429  |
| Within groups  | 507.457        | 18 | 28.1921     |         |         |
| Total (Corr.)  | 563.733        | 23 |             |         |         |

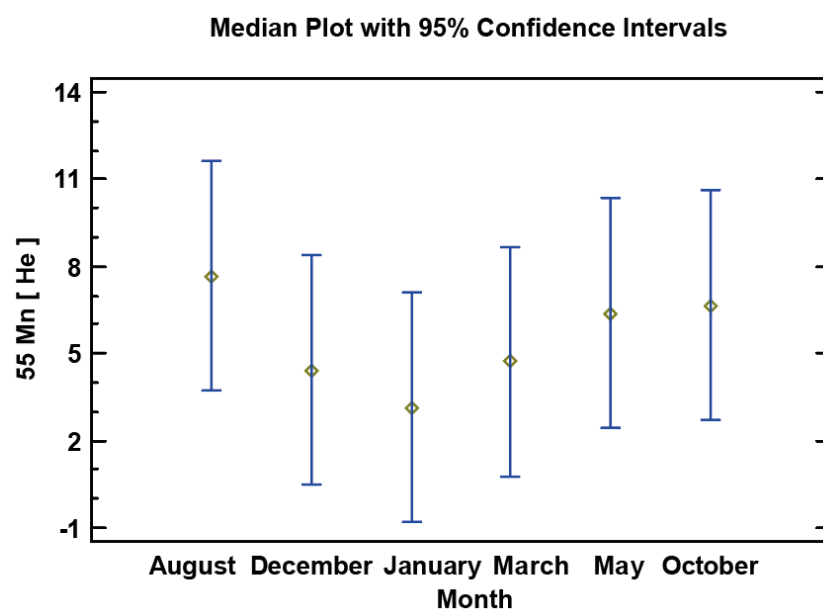

**Figure S5.** Median plot with 95% confidence intervals.

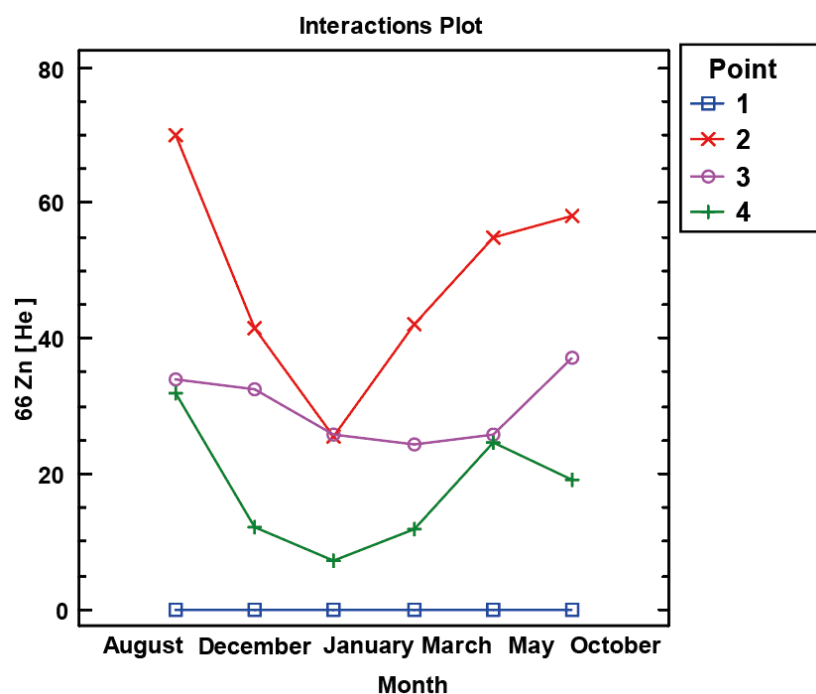

**Figure S6.**  $^{66}\text{Zn}$  [ He ] MANOVA: Point and month interaction.

**Table S7.** ANOVA Table for  $^{66}\text{Zn}$  [ He ] by Point.

| Source         | Sum of Squares | Df | Mean Square | F-Ratio | P-Value |
|----------------|----------------|----|-------------|---------|---------|
| Between gorups | 7543.24        | 3  | 2514.41     | 28.43   | 0.0000  |
| Within groups  | 1768.85        | 20 | 88.4427     |         |         |
| Total (Corr.)  | 9312.09        | 23 |             |         |         |

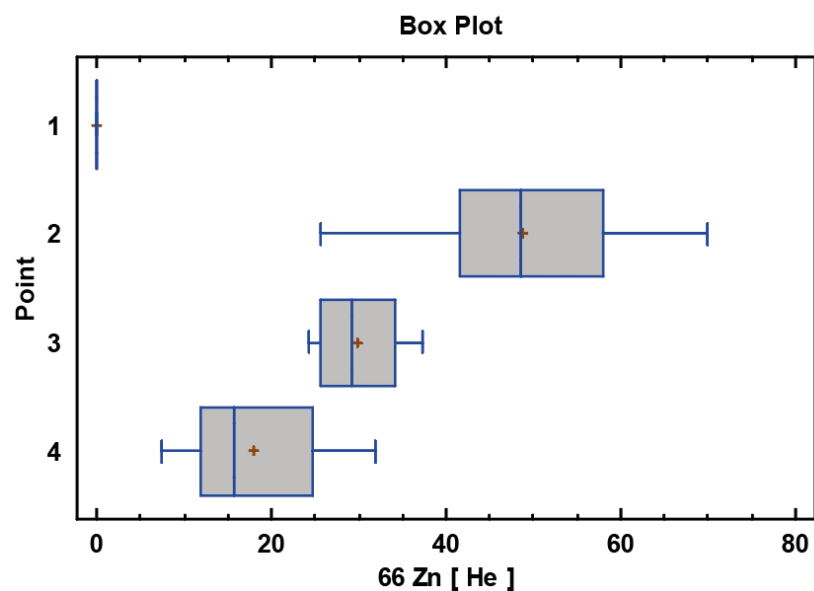

**Figure S7.** Box Plot.

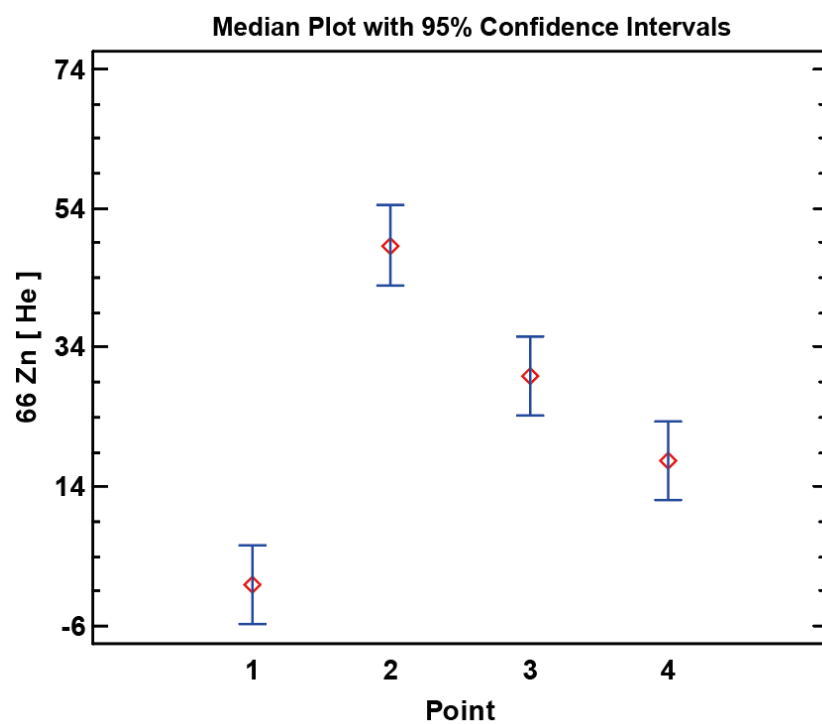

**Figure S8.** Median plot with 95% confidence intervals.

**Table S8.** ANOVA Table for  $^{66}\text{Zn}$  [ He ] by Mont.

| Source         | Sum of Squares | Df | Mean Square | F-Ratio | P-Value |
|----------------|----------------|----|-------------|---------|---------|
| Between gorups | 949.885        | 5  | 189.977     | 0.41    | 0.8363  |
| Within groups  | 8362.21        | 18 | 464.567     |         |         |
| Total (Corr.)  | 9312.09        | 23 |             |         |         |

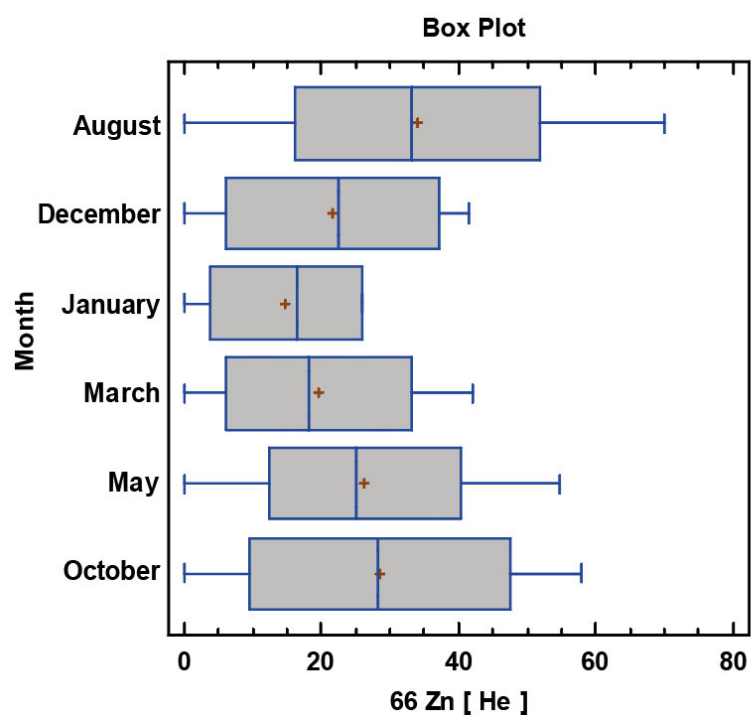

**Figure S9.** Box Plot.

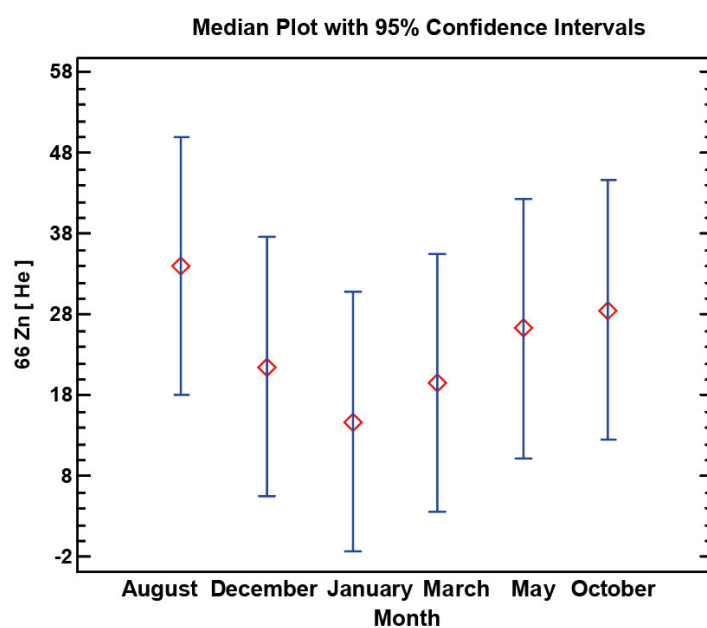

**Figure S10.** Median plot with 95% confidence intervals.

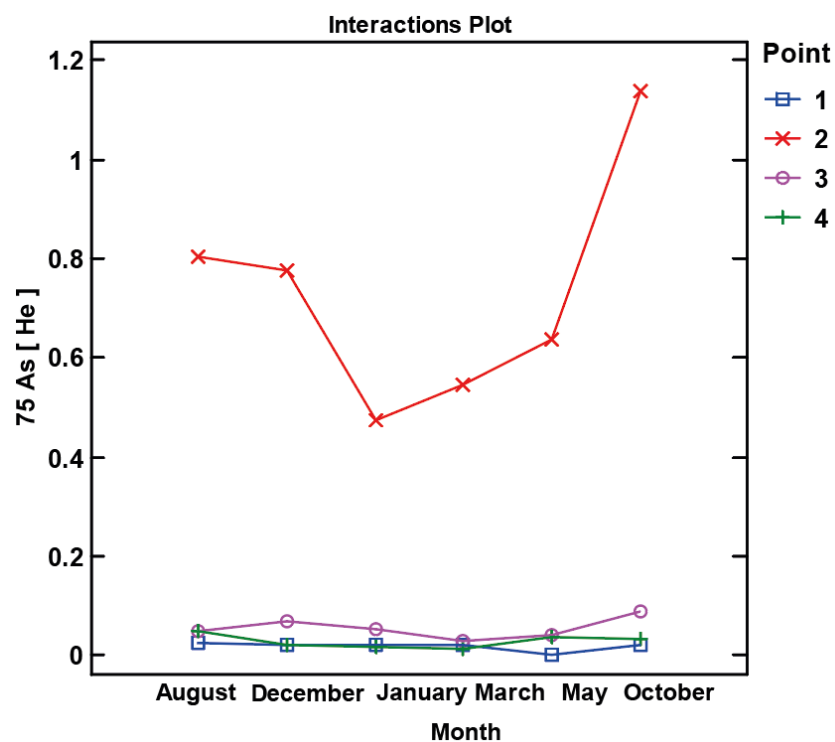

Figure 11. 75 As [ He ] - MANOVA: Point and month interaction.

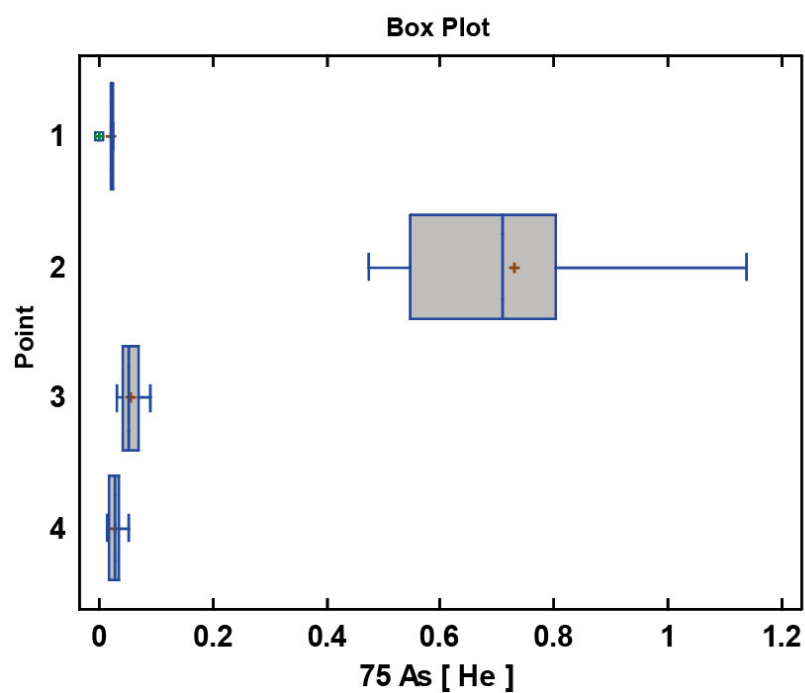

Figure 12. ANOVA: point.

Table S9. ANOVA for 75 As [ He ] por Parcela.

| Source         | Sum of Squares | Df | Mean Square | F-Ratio | P-Value |
|----------------|----------------|----|-------------|---------|---------|
| Between gorups | 2.18115        | 3  | 0.727052    | 51.14   | 0.0000  |
| Within groups  | 0.284319       | 20 | 0.0142159   |         |         |
| Total (Corr.)  | 2.46547        | 23 |             |         |         |

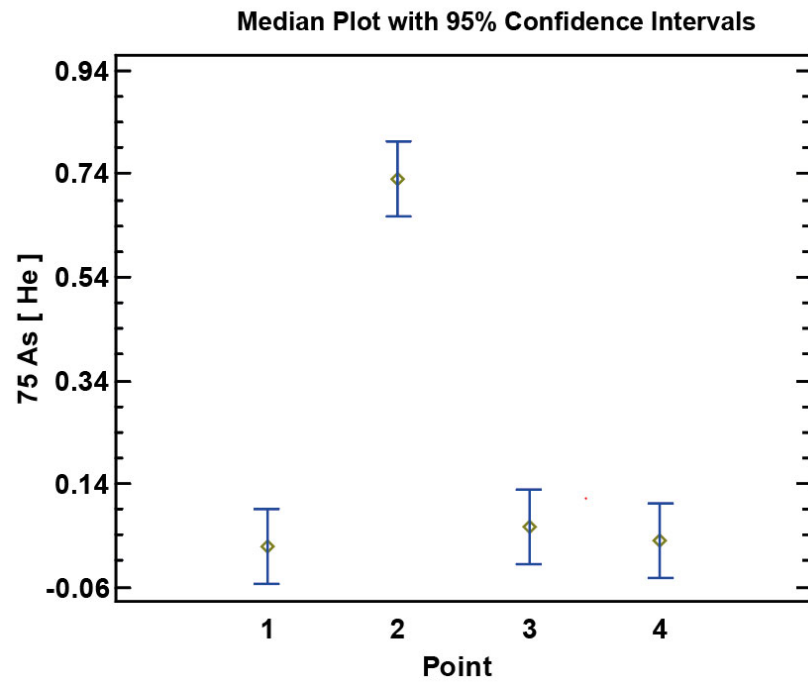

Figure S13. Median plot with 95% confidence intervals.

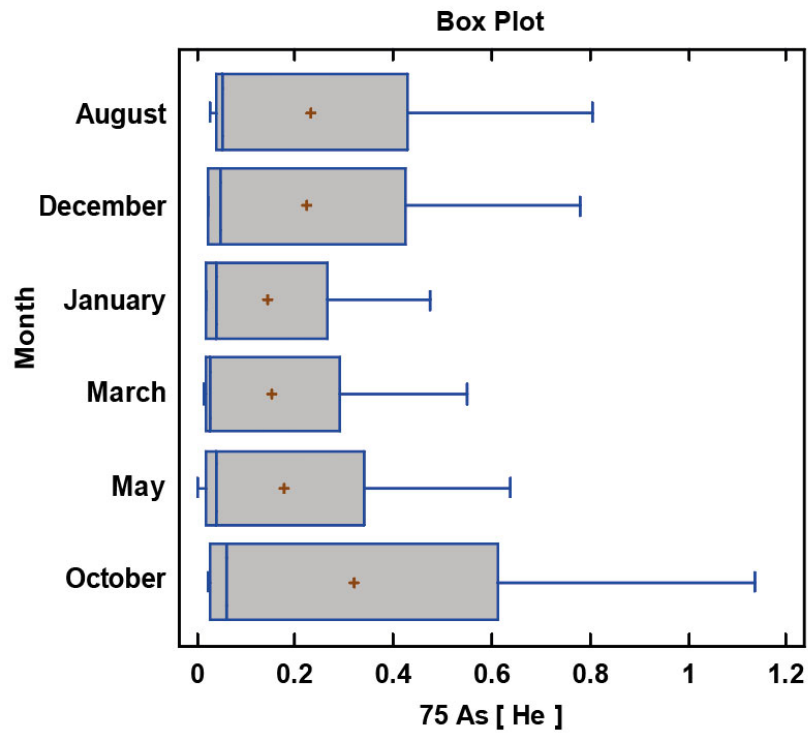

Figure S14. ANOVA: month.

Table S10. ANOVA for 75 As [ He ] for Month.

| Source         | Sum of Squares | Df | Mean Square | F-Ratio | P-Value |
|----------------|----------------|----|-------------|---------|---------|
| Between gorups | 0.086783       | 5  | 0.0173566   | 0.13    | 0.9831  |
| Within groups  | 2.37869        | 18 | 0.132149    |         |         |
| Total (Corr.)  | 2.46547        | 23 |             |         |         |

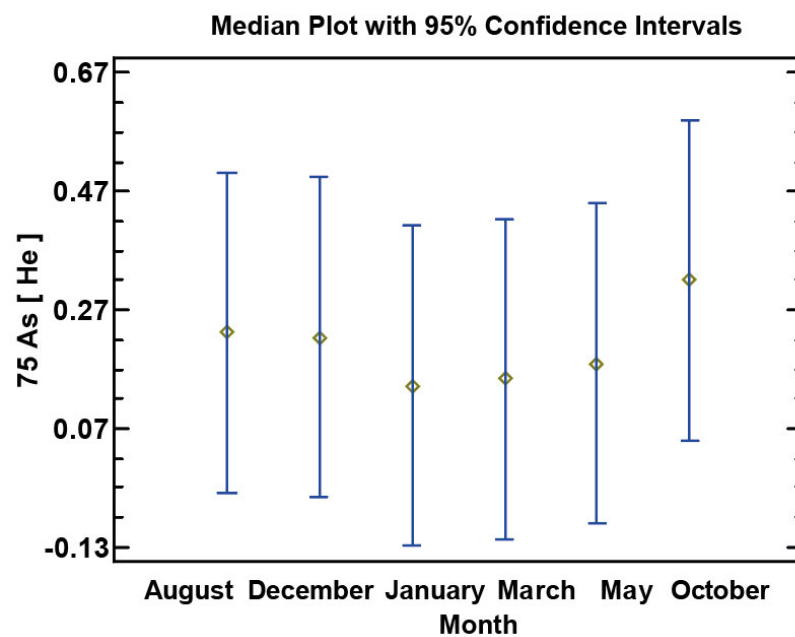

Figure S15. Median plot with 95% confidence intervals.

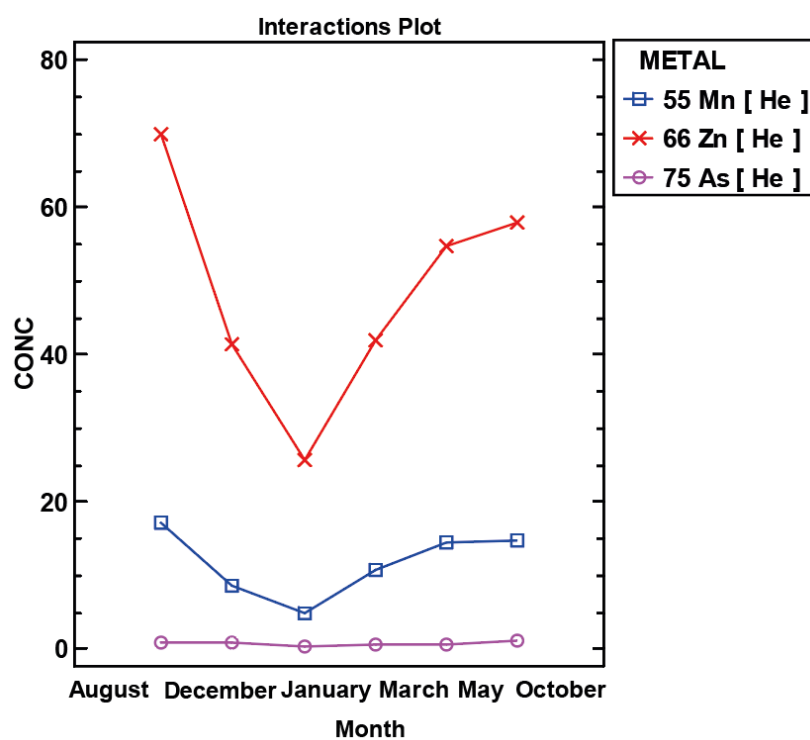

Figure S16. CONCENTRATION- MANOVA: metal and month interaction.

## ANOVA: metal

Table S11. ANOVA Table for CONC by METAL.

| Source         | Sum of Squares | Df | Mean Square | F-Ratio | P-Value |
|----------------|----------------|----|-------------|---------|---------|
| Between gorups | 7565.96        | 2  | 3782.98     | 43.47   | 0.0000  |
| Within groups  | 1305.42        | 15 | 87.0279     |         |         |
| Total (Corr.)  | 8871.38        | 17 |             |         |         |

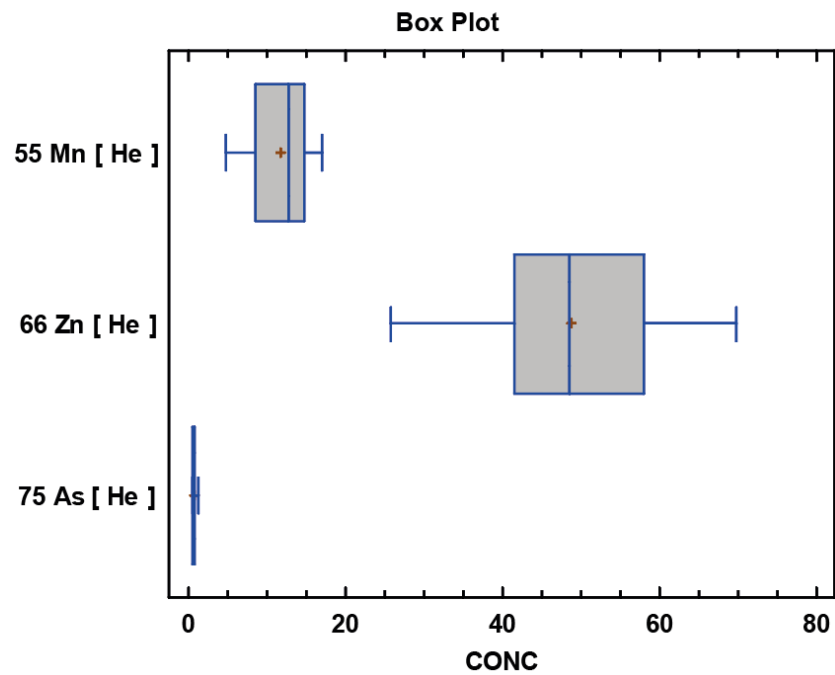

Figure S17. Box plot.

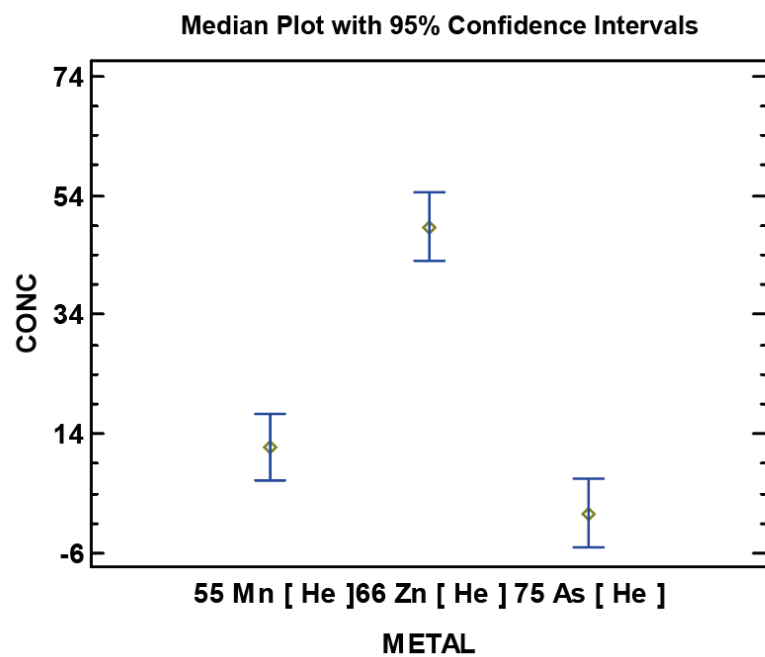

Figure S18. Median plot with 95% confidence intervals.

## ANOVA: month

Table S12. ANOVA table for CONC by Month.

| Source         | Sum of Squares | Df | Mean Square | F-Ratio | P-Value |
|----------------|----------------|----|-------------|---------|---------|
| Between gorups | 676.41         | 5  | 135.282     | 0.20    | 0.9572  |
| Within groups  | 8194.97        | 12 | 682.914     |         |         |
| Total (Corr.)  | 8871.38        | 17 |             |         |         |

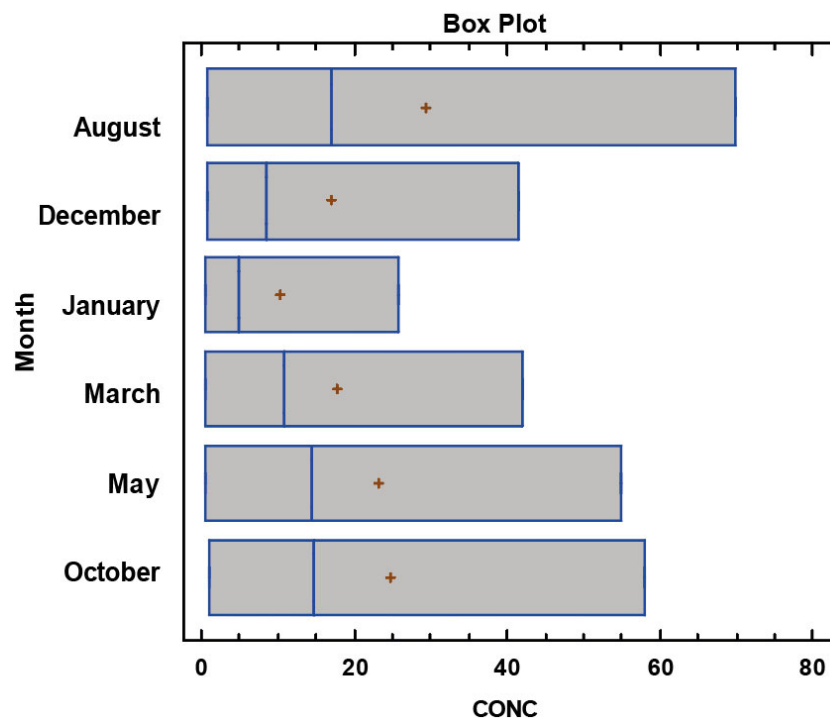

Figure S19. Box plot.

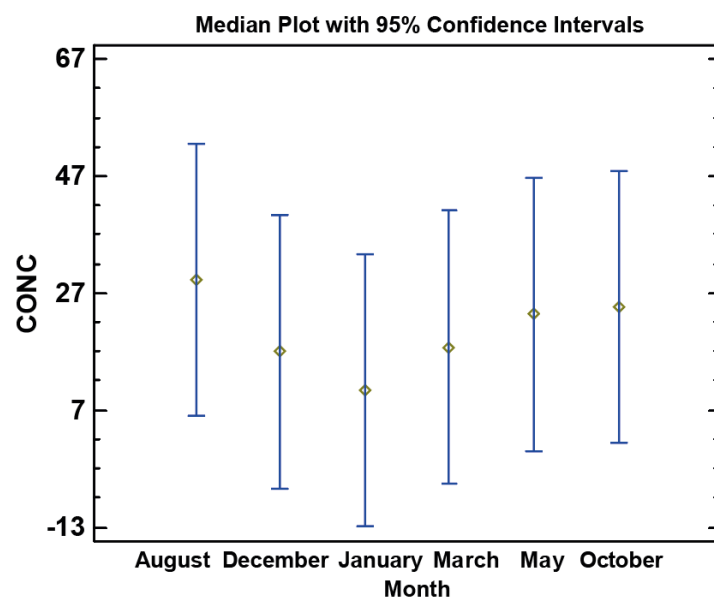

Figure S20. Median plot with 95% confidence intervals.

ANOVA: pH  
55 Mn[He]

Table S13. ANOVA Table by 55 Mn [ He ] by pH.

| Source         | Sum of Squares | Df | Mean Square | F-Ratio | P-Value |
|----------------|----------------|----|-------------|---------|---------|
| Between gorups | 241.252        | 1  | 241.252     | 16.46   | 0.0005  |
| Within groups  | 322.481        | 22 | 14.6582     |         |         |
| Total (Corr.)  | 563.733        | 23 |             |         |         |

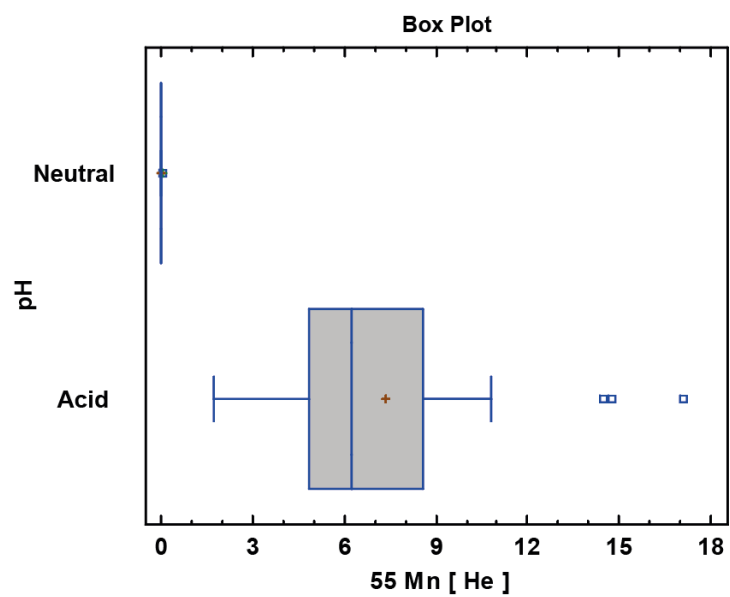

Figure S21. Box plot.

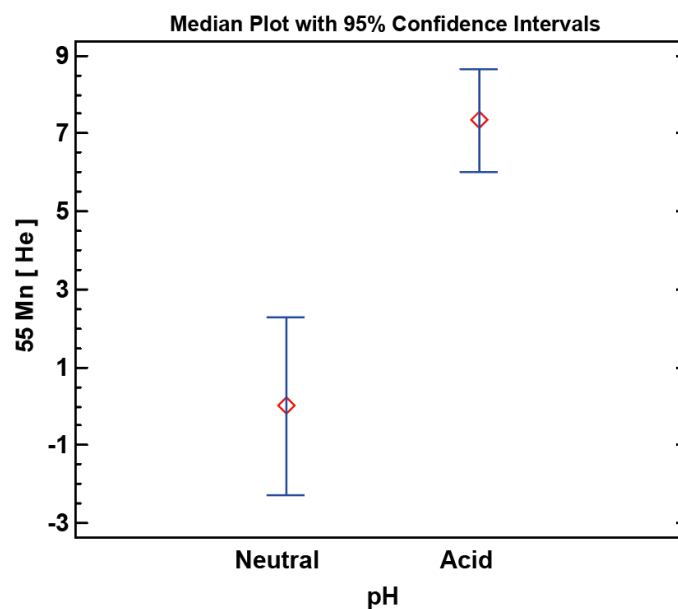

Figure S22. Median plot with 95% confidence intervals.

## 66 Zn[He]

Table S14. ANOVA Table for 66 Zn [ He ] by pH.

| Source         | Sum of Squares | Df | Mean Square | F-Ratio | P-Value |
|----------------|----------------|----|-------------|---------|---------|
| Between gorups | 4651.4         | 1  | 4651.4      | 21.96   | 0.0001  |
| Within groups  | 4660.69        | 22 | 211.85      |         |         |
| Total (Corr.)  | 9312.09        | 23 |             |         |         |

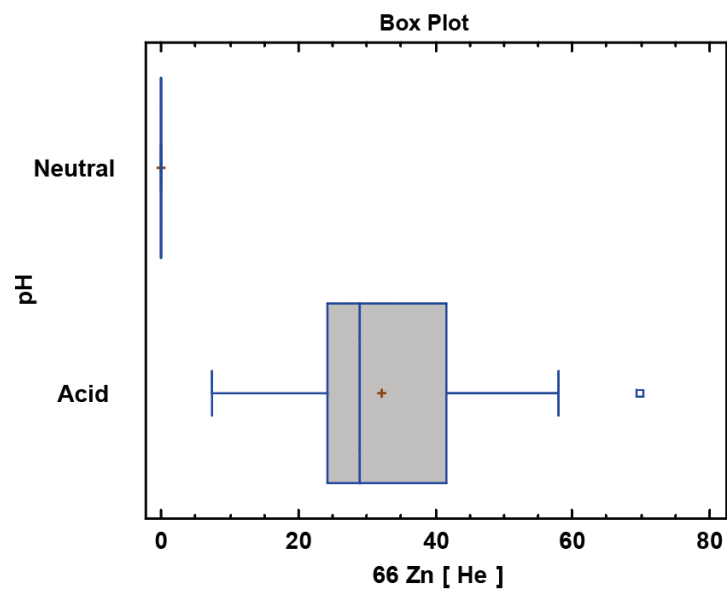

Figure S23. Box plot.

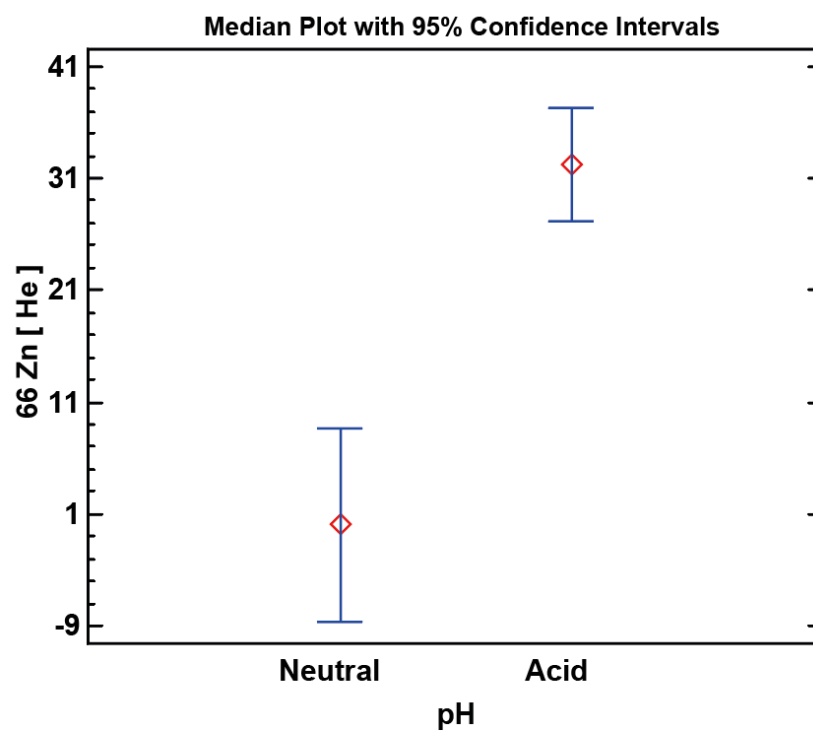

Figure S24. Median plot with 95% confidence intervals.

75 Zn[He]

Table S15. ANOVA Table for 75 As [ He ] by pH.

| Source         | Sum of Squares | Df | Mean Square | F-Ratio | P-Value |
|----------------|----------------|----|-------------|---------|---------|
| Between gorups | 0.286827       | 1  | 0.286827    | 2.90    | 0.1029  |
| Within groups  | 2.17865        | 22 | 0.0990294   |         |         |
| Total (Corr.)  | 2.46547        | 23 |             |         |         |

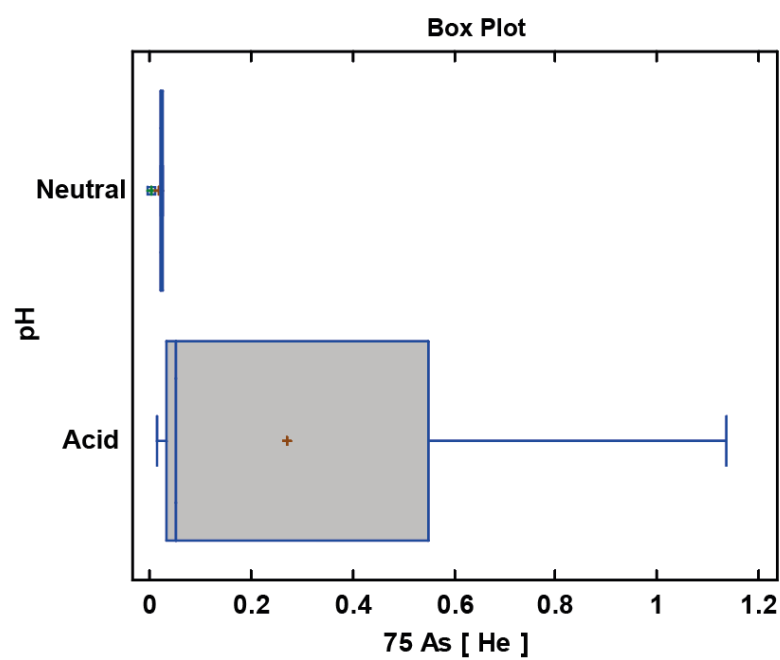

Figure S25. Box plot.

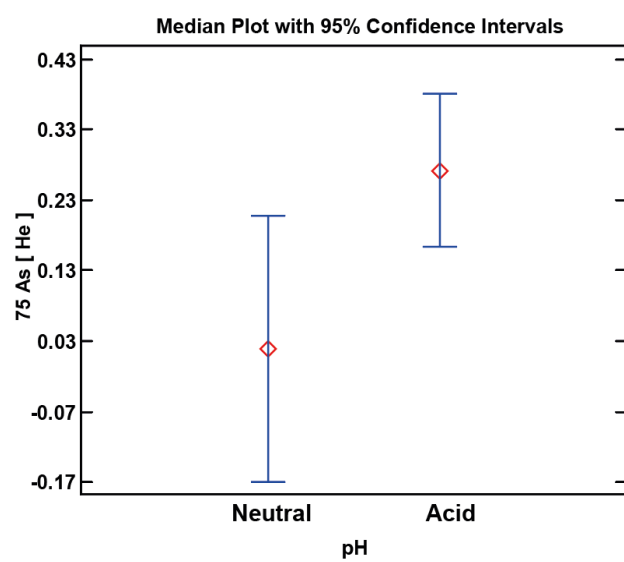

Figure S26. Median plot with 95% confidence intervals.
