# Supplementary material
Source: MDPI journal article supplement (https://www.mdpi.com/2076-3298/9/1/4)
Supplement: s1 [file s1]

## Index

### Excel file

Table S1: Results in situ parameters

Table S2: Results ex situ parameters

Table S3: Heavy metal selection methodology

Table S4: Precipitation in Milluni

### Word file

Table S5: ANOVA table for 55 Mn [ He ] by Point

Table S6: ANOVA table for 55 Mn [ He ] by Month

Table S7: ANOVA Table for 66 Zn [ He ] by Point

Table S8: ANOVA Table for 66 Zn [ He ] by Mont

Tabla S9: ANOVA para 75 As [ He ] por Parcela

Table S10: ANOVA for 75 As [ He ] for Month

Table S11: ANOVA Table for CONC by METAL

Table S12: ANOVA table for CONC by Month

Table S13: ANOVA Table by 55 Mn [ He ] by pH

Table S14: ANOVA Table for 66 Zn [ He ] by pH

Table S15: ANOVA Table for 75 As [ He ] by pH

Figure S1: MANOVA: Point and month interaction

Figure S2: ANOVA point

Figure S3: Median plot with 95% confidence intervals

Figure S4: ANOVA month

Figure S5: Median plot with 95% confidence intervals

Figure S6: 66 Zn [ He ] MANOVA: Point and month interaction

Figure S7: Box Plot

Figure S8: Median plot with 95% confidence intervals

Figure S9: Box Plot

Figure S10: Median plot with 95% confidence intervals

Figure S 11: 75 As [ He ] - MANOVA: Point and month interaction

Figure S 12: ANOVA: point

Figure S13: Median plot with 95% confidence intervals

Figure S14: ANOVA: month

Figure S15: Median plot with 95% confidence intervals

Figure S16: CONCENTRATION- MANOVA: metal and month interaction

Figure S17: Box plot

Figure S18: Median plot with 95% confidence intervals

Figure S19: Box plot

Figure S20: Median plot with 95% confidence intervals

Figure S21: Box plot

Figure S22: Median plot with 95% confidence intervals

Figure S23: Box plot

Figure S24: Median plot with 95% confidence intervals

Figure S25: Box plot

Figure S26: Median plot with 95% confidence intervals
